# Supplementary material for: Cost-Effectiveness of omadacycline versus moxifloxacin as the initial treatment for community-acquired bacterial pneumonia in China
Source: Research Square preprint supplement (doi:10.21203/rs.3.rs-7610117/v1), 2025-09-25
Supplement: Supplementary file 1 [file 7ca8473b2939a521e842850a.docx]

**
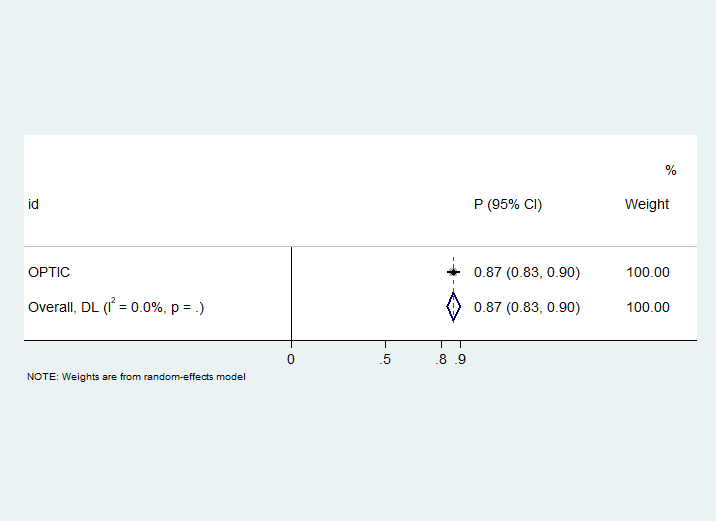
****Figure S1. The forest plot of probability of early clinical response for omadacycline**

**
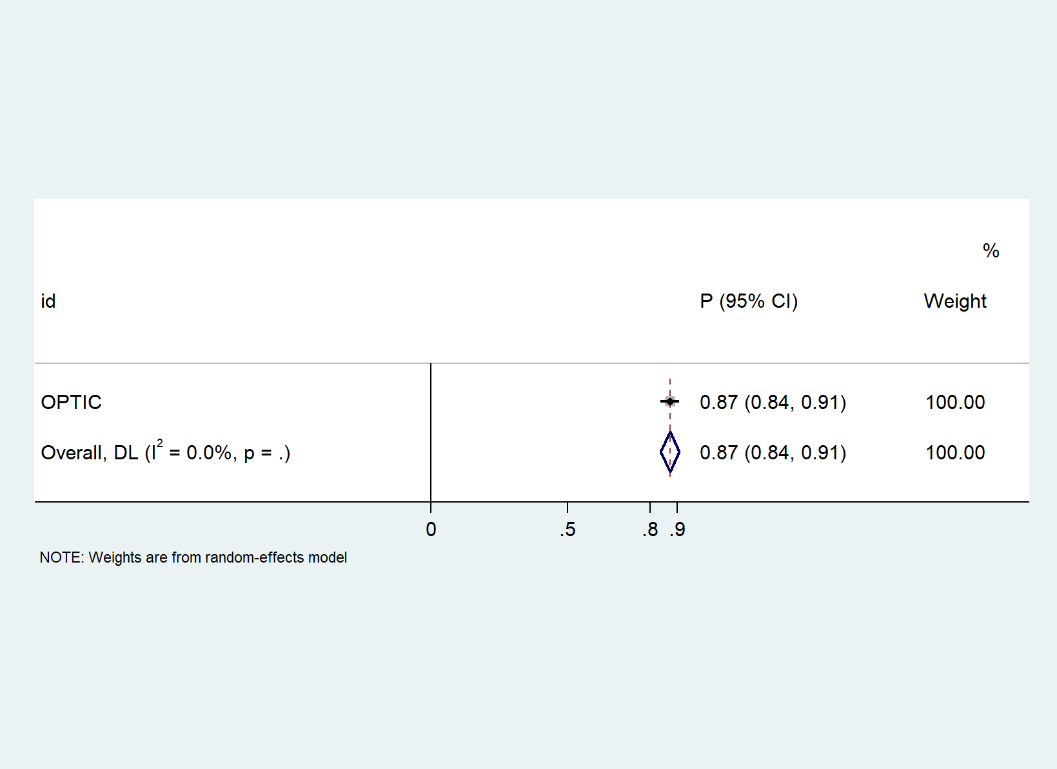
**

**Figure S2. The forest plot of probability of early clinical response for moxifloxacin**

**
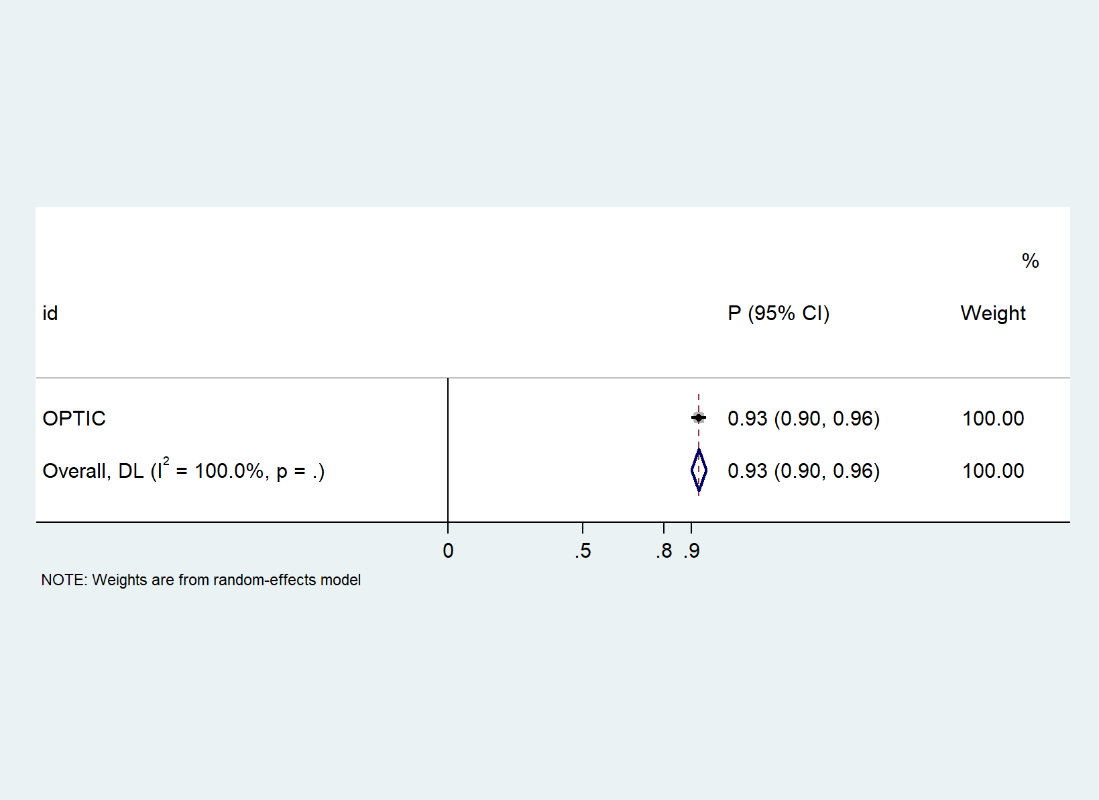
**

**Figure S3. The forest plot of probability of clinical cure for omadacycline**

**
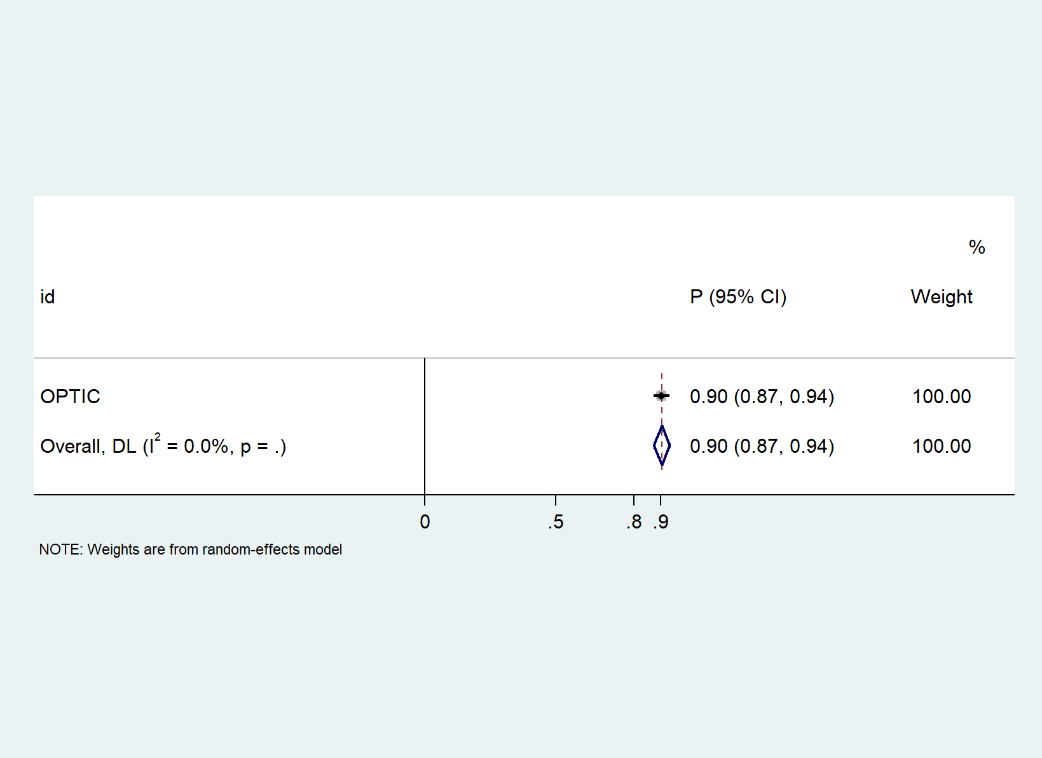
**

**Figure S4. The forest plot of probability of clinical cure for moxifloxacin**

**Table S1. Baseline Demographics (microITT Population).**

| Characteristica | Omadacycline(N=204) | Moxifloxacin(N=182) |
| --- | --- | --- |
| Age, years |  |  |
| Median age (range) | 60 (19–87) | 63 (26–86) |
| >65 years, n (%) | 77 (37.7) | 79 (43.4) |
| Male, n (%) | 113 (55.4) | 103 (56.6) |
| Body mass index, kg/m2 b | 27.3±5.6 | 27.0±5.8 |
| Creatinine clearance, n (%) |  |  |
| >80 mL/min | 95 (46.6) | 96 (52.7) |
| >50–80 mL/min | 73 (35.8) | 56 (30.8) |
| 30–50 mL/min | 36 (17.6) | 30 (16.5) |
| <30 mL/min | 0 | 0 |
| PORT Score b | 82.5±15.6 | 82.8±15.3 |
| PORT Risk Class, n (%) c |  |  |
| II (51 ≤ PORT Score ≤70) | 28 (13.7) | 25 (13.7) |
| III (71 ≤ PORT Score ≤90) | 126 (61.8) | 112 (61.5) |
| IV (91 ≤ PORT Score ≤130) | 49 (24.0) | 44 (24.2) |

Abbreviations: microITT, microbiological intent-to-treat.

a There were no significant differences (p < 0.05) between treatment groups using Fisher’s exact test (forcategorical variables) or Wilcoxon Rank Sum test (for continuous variables). b Mean ± standard deviation.

c 5 patients were randomized but were found to have non-qualifying PORT Risk Class I or V.

**Table S2. Baseline Demographics (non-microITT Population)**

| Characteristica | Omadacycline(N=182) | Moxifloxacin(N=206) |
| --- | --- | --- |
| Age, years |  |  |
| Median age (range) | 61 (22–97) | 64 (19–94) |
| >65 years, n (%) | 75 (41.2) | 93 (45.1) |
| Male, n (%) | 95 (52.2) | 116 (56.3) |
| Body mass index, kg/m2 b | 27.2±5.9 | 27.8±5.8 |
| Creatinine clearance, n (%) |  |  |
| >80 mL/min | 92 (50.5) | 111 (53.9) |
| >50 – 80 mL/min | 55 (30.2) | 63 (30.6) |
| 30 – 50 mL/min | 34 (18.7) | 32 (15.5) |
| <30 mL/min | 1 (0.5) |  |
| PORT Score b | 84.0±17.4 | 85.0±16.6 |
| PORT Risk Class, n (%) c |  |  |
| II (51 ≤ PORT Score ≤70) | 27 (14.8) | 29 (14.1) |
| III (71 ≤ PORT Score ≤90) | 101 (55.5) | 104 (50.5) |
| IV (91 ≤ PORT Score ≤130) | 53 (29.1) | 71 (34.5) |

Abbreviations: non-microITT, non-microbiological intent-to-treat.

The non-microITT population consisted of all randomized patients without at least 1 causative pathogen identified at baseline from a culture of a respiratory specimen, or culture of blood, or from a culture-independent method.

a There were no significant differences (p < 0.05) between treatment groups using Fisher’s exact test (for categorical variables) or Wilcoxon Rank Sum test (for continuous variables).b Mean ± standard deviation.

c 5 patients were randomized but were found to have non-qualifying PORT Risk Class I or V.

**Table S3. Baseline Demographics (Microbiologically Evaluable Population at Endof Treatment).**

| Characteristica | Omadacycline(N=193) | Moxifloxacin(N=172) |
| --- | --- | --- |
| Age, years |  |  |
| Median age (range) | 60 (19–87) | 63 (26–86) |
| >65 years, n (%) | 73 (37.8) | 74 (43.0) |
| Male, n (%) | 105 (54.4) | 97 (56.4) |
| Body mass index, kg/m2 b | 27.4±5.6 | 27.0±5.8 |
| Creatinine clearance, n (%) |  |  |
| >80 mL/min | 91 (47.2) | 91 (52.9) |
| >50 – 80 mL/min | 71 (36.8) | 53 (30.8) |
| 30 – 50 mL/min | 31 (16.1) | 28 (16.3) |
| <30 mL/min | 0 | 0 |
| PORT Score b | 82.2±14.8 | 82.8±14.4 |
| PORT Risk Class, n (%) c |  |  |
| II (51 ≤ PORT Score ≤70) | 26 (13.5) | 21 (12.2) |
| III (71 ≤ PORT Score ≤90) | 123 (63.7) | 109 (63.4) |
| IV (91 ≤ PORT Score ≤130) | 44 (22.8) | 42 (24.4) |

a There were no significant differences (p < 0.05) between treatment groups using Fisher’s exact test (for categorical variables) or Wilcoxon Rank Sum test (for continuous variables). b Mean ± standard deviation.

c 5 patients were randomized but were found to have non-qualifying PORT Risk Class I or V.

**Table S4. Baseline Demographics (Microbiologically Evaluable Population at Post-treatment Evaluation).**

| Characteristica | Omadacycline(N=188) | Moxifloxacin(N=169) |
| --- | --- | --- |
| Age, years |  |  |
| Median age (range) | 60 (19–87) | 63 (26–86) |
| >65 years, n (%) | 73 (38.8) | 74 (43.8) |
| Male, n (%) | 102 (54.3) | 95 (56.2) |
| Body mass index, kg/m2 b | 27.3±5.4 | 27.0±5.8 |
| Creatinine clearance, n (%) |  |  |
| >80 mL/min | 88 (46.8) | 88 (52.1) |
| >50 – 80 mL/min | 70 (37.2) | 54 (32.0) |
| 30 – 50 mL/min | 30 (16.0) | 27 (16.0) |
| <30 mL/min | 0 | 0 |
| PORT Score b | 82.4±14.9 | 82.4±14.3 |
| PORT Risk Class, n (%) c |  |  |
| II (51 ≤ PORT Score ≤70) | 25 (13.3) | 22 (13.0) |
| III (71 ≤ PORT Score ≤90) | 119 (63.3) | 107 (63.3) |
| IV (91 ≤ PORT Score ≤130) | 44 (23.4) | 40 (23.7) |

a There were no significant differences (p < 0.05) between treatment groups using Fisher’s exact test (for categorical variables) or Wilcoxon Rank Sum test (for continuous variables). b Mean ± standard deviation.

c 5 patients were randomized but were found to have non-qualifying PORT Risk Class I or V.

**Model Calculations**:

**Cost Calculation of ECR for omadacycline**:

Cost of IV omadacycline first day+(Cost of IV omadacycline)*2 days+ (Cost of hospital per day)*3 days +(Cost of inpatient examination per day)* 3 days +(Cost of nursing care per day)* 3 days +(Cost of PO omadacycline) * 7 days) +Cost of laboratory examinations*2 times+(Cost of diarrhea)*(Probability of omadacycline diarrhea)

**Cost Calculation of No ECR for omadacycline**:

Cost of IV omadacycline first day+(Cost of IV omadacycline)*2 days + (Cost of hospital per day)*10 days +(Cost of inpatient examination per day)* 10 days +(Cost of nursing care per day)* 10 days + (Cost of IV omadacycline) * 7 days +(Cost of laboratory examinations) *5 times+(Cost of diarrhea)*(Probability of omadacycline diarrhea)

**Cost Calculation of ECR for Moxifloxacin**:

(Cost of IV moxifloxacin) * 3 days + (Cost of hospital per day)*3 days +(Cost of inpatient examination per day)* 3 days +(Cost of nursing care per day) * 3 days +(Cost of PO moxifloxacin) * 7 days) +Cost of laboratory examinations*2 times+(Cost of diarrhea)*(Probability of moxifloxacin diarrhea)

**Cost Calculation of No ECR for Moxifloxacin**:

Cost of IV moxifloxacin *10 days + (Cost of hospital per day)*10 days +(Cost of inpatient examination per day)* 10 days +(Cost of nursing care per day)* 10 days +(Cost of laboratory examinations) *5 times+(Cost of diarrhea)*(Probability of moxifloxacin diarrhea)

**QALYs**:

(Probability of success) * (Utility of treatment succuss) + (Probability of failure) * (Utility of treatment failure)
